# Supplementary material for: Development of International Terminology and Definitions for Texture-Modified Foods and Thickened Fluids Used in Dysphagia Management: The IDDSI Framework
Source: Springer Nature journal article supplement (doi:10.1007/s00455-016-9758-y), 2016-12-02
Supplement: MOESM1 [file 11108270]

# Appendix IDDSI Framework

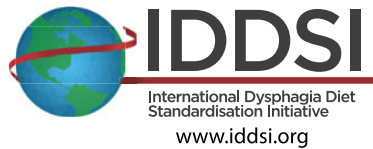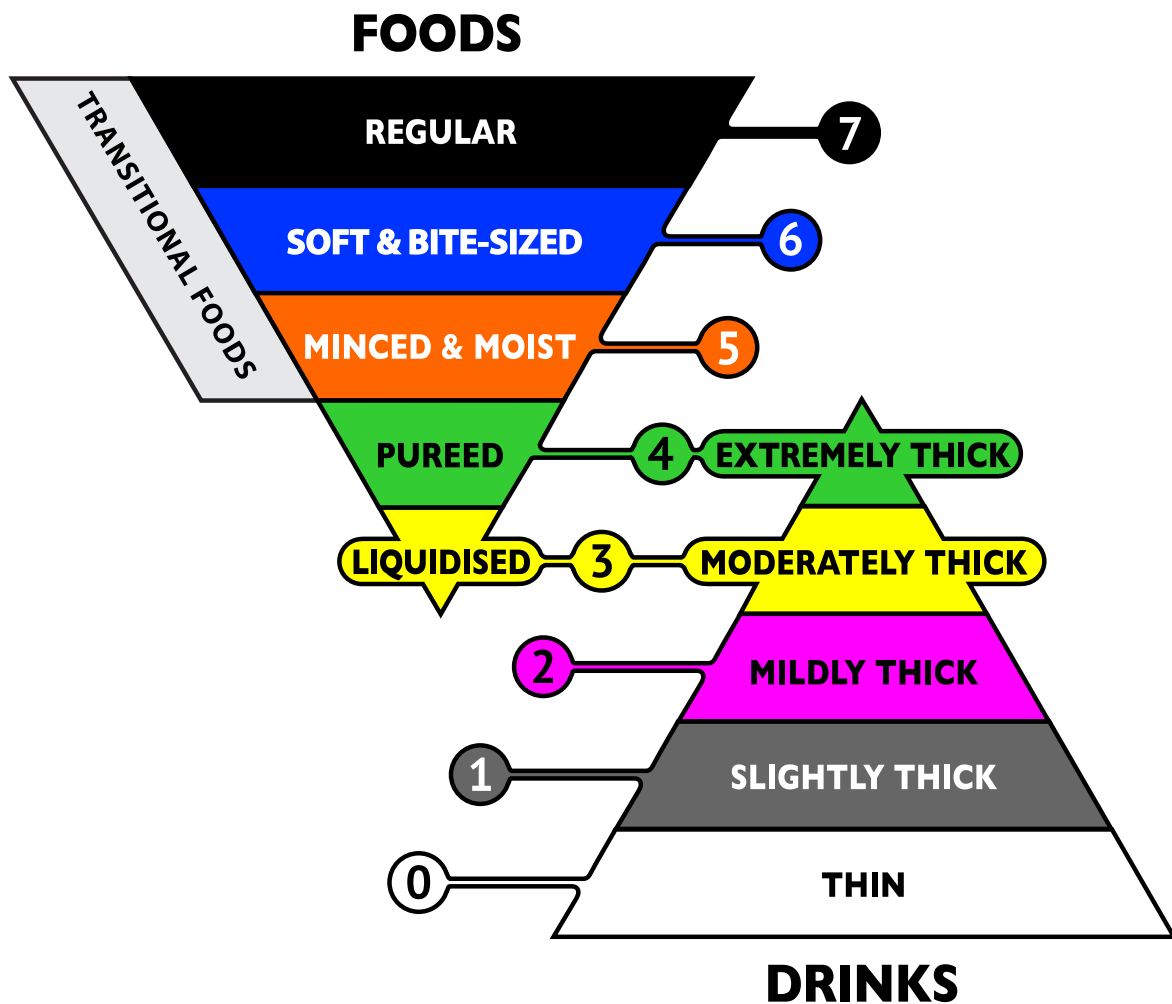

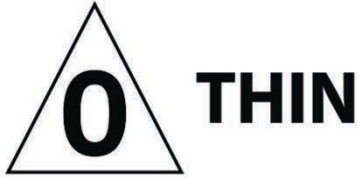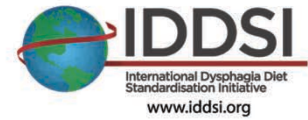

|                                                     |                                                                                                                                                                                            |
|-----------------------------------------------------|--------------------------------------------------------------------------------------------------------------------------------------------------------------------------------------------|
| Description/<br>Characteristics                     | <ul style="list-style-type: none"><li>• Flows like water</li><li>• Fast flow</li><li>• Can drink through any type of teat/nipple, cup or straw as appropriate for age and skills</li></ul> |
| Physiological rationale for this level of thickness | <ul style="list-style-type: none"><li>• Functional ability to safely manage liquids of all types</li></ul>                                                                                 |
| TESTING METHOD<br>IDDSI Flow Test*                  | <ul style="list-style-type: none"><li>• Test liquid flows through a 10 mL slip tip syringe completely within 10 seconds, leaving no residue (see IDDSI Flow Test instructions*)</li></ul>  |

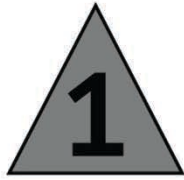

# SLIGHTLY THICK

|                                                     |                                                                                                                                                                                                                                                                                                      |
|-----------------------------------------------------|------------------------------------------------------------------------------------------------------------------------------------------------------------------------------------------------------------------------------------------------------------------------------------------------------|
| Description/<br>Characteristics                     | <ul style="list-style-type: none"><li>• Thicker than water</li><li>• Requires a little more effort to drink than thin liquids</li><li>• Flows through a straw, syringe, teat/nipple</li><li>• Similar to the thickness of commercially available 'Anti-regurgitation' (AR) infant formula</li></ul>  |
| Physiological rationale for this level of thickness | <ul style="list-style-type: none"><li>• Predominantly used in the paediatric population as a thickened drink that reduces speed of flow yet is still able to flow through an infant teat/nipple. Consideration to flow through a teat/nipple should be determined on a case-by-case basis.</li></ul> |
| TESTING METHOD<br>IDDSI Flow Test*                  | <ul style="list-style-type: none"><li>• Test liquid flows through a 10 mL slip tip syringe leaving 1-4 mL in the syringe after 10 seconds (see IDDSI Flow Test instructions*)</li></ul>                                                                                                              |

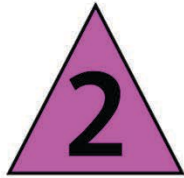

## MILDLY THICK

|                                                     |                                                                                                                                                                                                                                                                                        |
|-----------------------------------------------------|----------------------------------------------------------------------------------------------------------------------------------------------------------------------------------------------------------------------------------------------------------------------------------------|
| Description/<br>Characteristics                     | <ul style="list-style-type: none"><li>• Flows off a spoon</li><li>• Sippable, pours quickly from a spoon, but slower than thin drinks</li><li>• Effort is required to drink this thickness through standard bore straw (standard bore straw = 0.209 inch or 5.3 mm diameter)</li></ul> |
| Physiological rationale for this level of thickness | <ul style="list-style-type: none"><li>• If thin drinks flow too fast to be controlled safely, these Mildly Thick liquids will flow at a slightly slower rate</li><li>• May be suitable if tongue control is slightly reduced.</li></ul>                                                |
| TESTING METHOD<br>IDDSI Flow Test*                  | <ul style="list-style-type: none"><li>• Test liquid flows through a 10 mL slip tip syringe leaving 4 to 8 ml in the syringe after 10 seconds (see IDDSI Flow Test instructions*)</li></ul>                                                                                             |

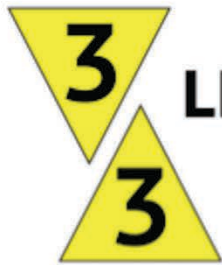

**LIQUIDISED**

**MODERATELY THICK**

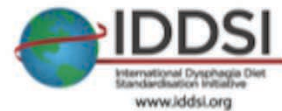

|                                                                                       |                                                                                                                                                                                                                                                                                                                                                                                                                                                                                                                                                                                                          |
|---------------------------------------------------------------------------------------|----------------------------------------------------------------------------------------------------------------------------------------------------------------------------------------------------------------------------------------------------------------------------------------------------------------------------------------------------------------------------------------------------------------------------------------------------------------------------------------------------------------------------------------------------------------------------------------------------------|
| <p>Description/characteristics</p> <p>Texture restrictions shown in summary table</p> | <ul style="list-style-type: none"> <li>• Can be drunk from a cup</li> <li>• Some effort is required to suck through a standard bore or wide bore straw (wide bore straw = 0.275 inch or 6.9 mm)</li> <li>• Cannot be piped, layered or moulded on a plate</li> <li>• Cannot be eaten with a fork because it drips slowly in dollops through the prongs</li> <li>• Can be eaten with a spoon</li> <li>• No oral processing or chewing required – can be swallowed directly</li> <li>• Smooth texture with no ‘bits’ (lumps, fibers, bits of shell or skin, husk, particles of gristle or bone)</li> </ul> |
| <p>Physiological rationale for this level of thickness</p>                            | <ul style="list-style-type: none"> <li>• If tongue control is insufficient to manage Mildly Thick drinks (Level 2), this Liquidised/Moderately thick level may be suitable</li> <li>• Allows more time for oral control</li> <li>• Needs some tongue propulsion effort</li> <li>• Pain on swallowing</li> </ul>                                                                                                                                                                                                                                                                                          |
| <p>TESTING METHOD</p> <p>IDDSI Flow Test*</p>                                         | <ul style="list-style-type: none"> <li>• Test liquid flows through a 10 ml slip tip syringe leaving &gt; 8 ml in the syringe after 10 seconds (see Syringe Test Guide*)</li> </ul>                                                                                                                                                                                                                                                                                                                                                                                                                       |
| <p>Fork Drip Test</p>                                                                 | <ul style="list-style-type: none"> <li>• Drips slowly in dollops through the prongs of a fork</li> <li>• Tines/Prongs of a fork do <u>not</u> leave a clear pattern on the surface</li> <li>• Spreads out if spilled onto a flat surface</li> </ul>                                                                                                                                                                                                                                                                                                                                                      |
| <p>Spoon Tilt Test</p>                                                                | <ul style="list-style-type: none"> <li>• Easily pours from spoon when tilted; does not stick to spoon</li> </ul>                                                                                                                                                                                                                                                                                                                                                                                                                                                                                         |
| <p>Chopstick Test</p>                                                                 | <ul style="list-style-type: none"> <li>• Chopsticks are not suitable for this texture</li> </ul>                                                                                                                                                                                                                                                                                                                                                                                                                                                                                                         |
| <p>Finger Test</p>                                                                    | <ul style="list-style-type: none"> <li>• It is not possible to hold a sample of this food texture using fingers, however, this texture slides smoothly and easily between the thumb and fingers, leaving a coating</li> </ul>                                                                                                                                                                                                                                                                                                                                                                            |

|                                                                         |                                                                                                                                                                                                                     |
|-------------------------------------------------------------------------|---------------------------------------------------------------------------------------------------------------------------------------------------------------------------------------------------------------------|
| Food specific or<br>Other examples<br>(NB. this list is not exhaustive) | The following items may fit into this category: <ul style="list-style-type: none"><li>• Infant “first foods” (runny rice cereal or runny pureed fruit)</li><li>• Sauces and gravies</li><li>• Fruit syrup</li></ul> |
|-------------------------------------------------------------------------|---------------------------------------------------------------------------------------------------------------------------------------------------------------------------------------------------------------------|

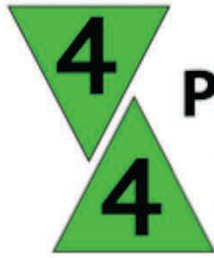

# PUREED EXTREMELY THICK

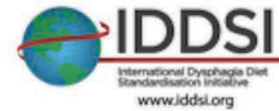

|                                                                                       |                                                                                                                                                                                                                                                                                                                                                                                                                                                                                                                                                                                                                                           |
|---------------------------------------------------------------------------------------|-------------------------------------------------------------------------------------------------------------------------------------------------------------------------------------------------------------------------------------------------------------------------------------------------------------------------------------------------------------------------------------------------------------------------------------------------------------------------------------------------------------------------------------------------------------------------------------------------------------------------------------------|
| <p>Description/characteristics</p> <p>Texture restrictions shown in summary table</p> | <ul style="list-style-type: none"> <li>• Usually eaten with a spoon (a fork is possible)</li> <li>• Cannot be drunk from a cup</li> <li>• Cannot be sucked through a straw</li> <li>• Does not require chewing</li> <li>• Can be piped, layered or molded</li> <li>• Shows some very slow movement under gravity but cannot be poured</li> <li>• Falls off spoon in a single spoonful when tilted and continues to hold shape on a plate</li> <li>• No lumps</li> <li>• <u>Not</u> sticky</li> <li>• Liquid must not separate from solid</li> </ul>                                                                                       |
| <p>Physiological rationale for this level of thickness</p>                            | <ul style="list-style-type: none"> <li>• If tongue control is significantly reduced, this category may be easiest to manage</li> <li>• Requires less propulsion effort than Minced &amp; Minced (level 5), Soft &amp; Bite-Sized (Level 6) and Regular (Level 7) but more than Liquidised/Moderately thick (Level 3)</li> <li>• No biting or chewing is required</li> <li>• Increased residue is a risk if too sticky</li> <li>• Any food that requires chewing, controlled manipulation or bolus formation are <u>not</u> suitable</li> <li>• Pain on chewing or swallowing</li> <li>• Missing teeth, poorly fitting dentures</li> </ul> |
| <p>TESTING METHOD</p> <p>IDDSI Flow test*</p>                                         | <ul style="list-style-type: none"> <li>• No flow or drip through a slip tip syringe after 10 sec (refer to IDDSI Flow test instructions)*</li> </ul>                                                                                                                                                                                                                                                                                                                                                                                                                                                                                      |
| <p>Fork Pressure test</p>                                                             | <ul style="list-style-type: none"> <li>• The tines/prongs of a fork can make a clear pattern on the surface, and/or the food retains the indentation from the fork</li> <li>• No lumps</li> </ul>                                                                                                                                                                                                                                                                                                                                                                                                                                         |
| <p>Fork Drip test</p>                                                                 | <ul style="list-style-type: none"> <li>• Sample sits in a mound/pile above the fork; a small amount may flow through and form a tail <u>below</u> the fork tines/prongs, but it <u>does not</u> flow or drip <u>continuously</u> through the prongs of a fork</li> </ul>                                                                                                                                                                                                                                                                                                                                                                  |

|                                       |                                                                                                                                                                                                                                                                                                                                                                                                                                                                                           |
|---------------------------------------|-------------------------------------------------------------------------------------------------------------------------------------------------------------------------------------------------------------------------------------------------------------------------------------------------------------------------------------------------------------------------------------------------------------------------------------------------------------------------------------------|
| Spoon Tilt test                       | <ul style="list-style-type: none"> <li>• Cohesive enough to hold its shape on the spoon</li> <li>• A full spoonful must plop off the spoon if the spoon is titled or turned sideways; a very gentle flick may be necessary to dislodge the sample from the spoon, but the sample should slide off easily with very little food left on the spoon; i.e. the sample should <u>not</u> be firm and sticky</li> <li>• May spread out slightly or slump very slowly on a flat plate</li> </ul> |
| Chopstick test                        | <ul style="list-style-type: none"> <li>• Chopsticks are not suitable for this texture</li> </ul>                                                                                                                                                                                                                                                                                                                                                                                          |
| Finger test                           | <ul style="list-style-type: none"> <li>• It is just possible to hold a sample of this texture using fingers. The texture slides smoothly and easily between the fingers and leaves noticeable residue</li> </ul>                                                                                                                                                                                                                                                                          |
| Indicators that a sample is too thick | <ul style="list-style-type: none"> <li>• Does not fall off the spoon when tilted</li> <li>• Sticks to spoon</li> </ul>                                                                                                                                                                                                                                                                                                                                                                    |
| Food specific or Other examples       | <p>The following item may fit into this category:</p> <ul style="list-style-type: none"> <li>• Purees suitable for infants (e.g. pureed meat, thick cereal)</li> </ul>                                                                                                                                                                                                                                                                                                                    |



# 5

## MINCED & MOIST

|                                                                                       |                                                                                                                                                                                                                                                                                                                                                                                                                                                                                                                                                                      |
|---------------------------------------------------------------------------------------|----------------------------------------------------------------------------------------------------------------------------------------------------------------------------------------------------------------------------------------------------------------------------------------------------------------------------------------------------------------------------------------------------------------------------------------------------------------------------------------------------------------------------------------------------------------------|
| <p>Description/characteristics</p> <p>Texture restrictions shown in summary table</p> | <ul style="list-style-type: none"> <li>• Can be eaten with a fork or spoon</li> <li>• Could be eaten with chopsticks in some cases, if the individual has very good hand control</li> <li>• Can be scooped and shaped (e.g. into a ball shape) on a plate</li> <li>• Soft and moist with no separate thin liquid</li> <li>• Small lumps visible within the food             <ul style="list-style-type: none"> <li>• <i>Paediatric, 2 mm lump size</i></li> <li>• <i>Adult, 4mm lump size</i></li> </ul> </li> <li>• Lumps are easy to squash with tongue</li> </ul> |
| <p>Physiological rationale for this level of thickness</p>                            | <ul style="list-style-type: none"> <li>• Biting is not required</li> <li>• Minimal chewing is required</li> <li>• Tongue force alone can be used to break soft small particles in this texture</li> <li>• Tongue force is required to move the bolus</li> <li>• Pain or fatigue on chewing</li> <li>• Missing teeth, poorly fitting dentures</li> </ul>                                                                                                                                                                                                              |
| <p>TESTING METHOD</p> <p>Fork Pressure test</p>                                       | <ul style="list-style-type: none"> <li>• When pressed with a fork the particles should easily be separated between and come through the tines/prongs of a fork</li> <li>• Can be easily mashed with little pressure from a fork [pressure should <u>not</u> make the thumb nail blanch to white]</li> </ul>                                                                                                                                                                                                                                                          |
| <p>Fork Drip test</p>                                                                 | <ul style="list-style-type: none"> <li>• A scooped sample sits in a pile or can mound on the fork and does not easily or completely flow or fall through the tines/prongs of a fork</li> </ul>                                                                                                                                                                                                                                                                                                                                                                       |
| <p>Spoon Tilt test</p>                                                                | <ul style="list-style-type: none"> <li>• Cohesive enough to hold its shape on the spoon</li> <li>• A full spoonful must slide/pour off the spoon if the spoon is tilted or turned sideways or shaken lightly; the sample should slide off easily with very little food left on the spoon; i.e. the sample should <u>not</u> be sticky</li> <li>• A scooped mound may spread or slump very slightly on a plate</li> </ul>                                                                                                                                             |
| <p>Chopstick test</p>                                                                 | <ul style="list-style-type: none"> <li>• Chopsticks can be used to scoop or hold this texture if the sample is moist and cohesive <i>and</i> the person has very good hand control to use chopsticks</li> </ul>                                                                                                                                                                                                                                                                                                                                                      |

|                                                                                                                                  |                                                                                                                                                                                                                                                                                                                                                                                                                                                                                                                                                                                                                                                                                                                                                                                                                                                                                                                                                                                                                                                                                                                                                                                                                                                                                                                                                                                                                                                                                                                                                                                                                                |
|----------------------------------------------------------------------------------------------------------------------------------|--------------------------------------------------------------------------------------------------------------------------------------------------------------------------------------------------------------------------------------------------------------------------------------------------------------------------------------------------------------------------------------------------------------------------------------------------------------------------------------------------------------------------------------------------------------------------------------------------------------------------------------------------------------------------------------------------------------------------------------------------------------------------------------------------------------------------------------------------------------------------------------------------------------------------------------------------------------------------------------------------------------------------------------------------------------------------------------------------------------------------------------------------------------------------------------------------------------------------------------------------------------------------------------------------------------------------------------------------------------------------------------------------------------------------------------------------------------------------------------------------------------------------------------------------------------------------------------------------------------------------------|
| <p>Finger test</p>                                                                                                               | <ul style="list-style-type: none"> <li>It is possible to easily hold a sample of this texture using fingers; small soft, smooth, rounded particles can be easily squashed between fingers. The material will feel moist and leave fingers wet.</li> </ul>                                                                                                                                                                                                                                                                                                                                                                                                                                                                                                                                                                                                                                                                                                                                                                                                                                                                                                                                                                                                                                                                                                                                                                                                                                                                                                                                                                      |
| <p>Food specific or<br/>Other examples</p> <p>Note:</p> <p><i>Paediatric, 2 mm lump size</i><br/><i>Adult, 4mm lump size</i></p> | <p><b>MEAT</b></p> <ul style="list-style-type: none"> <li>Finely minced or chopped, tender mince <ul style="list-style-type: none"> <li><i>Paediatric, 2mm lump size</i></li> <li><i>Adult, 4mm lump size</i></li> </ul> </li> <li>Serve in extremely thick, smooth, non-pouring sauce or gravy</li> <li>*If texture cannot be finely minced it should be pureed</li> </ul> <p><b>FISH</b></p> <ul style="list-style-type: none"> <li>Finely mashed in extremely thick smooth, non-pouring sauce or gravy</li> </ul> <p><b>FRUIT</b></p> <ul style="list-style-type: none"> <li>Serve mashed</li> <li>Drain excess juice</li> </ul> <p><b>VEGETABLES</b></p> <ul style="list-style-type: none"> <li>Finely minced or chopped or mashed</li> <li>Drain any liquid</li> </ul> <p><b>CEREAL</b></p> <ul style="list-style-type: none"> <li>Very thick and smooth with small soft lumps <ul style="list-style-type: none"> <li><i>Paediatric, 2mm lump size</i></li> <li><i>Adult, 4mm lump size</i></li> </ul> </li> <li>Texture fully softened</li> <li>Any milk/fluid must <u>not</u> separate away from cereal. Drain any excess fluid before serving</li> </ul> <p><b>BREAD</b></p> <ul style="list-style-type: none"> <li>Pre-gelled 'soaked' breads that are very moist and gelled through the entire thickness</li> <li>No regular, dry bread</li> </ul> <p><b>RICE</b></p> <ul style="list-style-type: none"> <li><u>Not</u> sticky or glutinous (particularly short grain rice) and should <u>not</u> be particulate or separate into individual grains when cooked and served (particularly long grain rice)</li> </ul> |

# 6

# SOFT & BITE-SIZED

|                                                                                       |                                                                                                                                                                                                                                                                                                                                                                                                                                                                                                                                                                                                                                                          |
|---------------------------------------------------------------------------------------|----------------------------------------------------------------------------------------------------------------------------------------------------------------------------------------------------------------------------------------------------------------------------------------------------------------------------------------------------------------------------------------------------------------------------------------------------------------------------------------------------------------------------------------------------------------------------------------------------------------------------------------------------------|
| <p>Description/characteristics</p> <p>Texture restrictions shown in summary table</p> | <ul style="list-style-type: none"> <li>• Can be eaten with a fork, spoon or chopsticks</li> <li>• Can be mashed/broken down with pressure from fork, spoon or chopsticks</li> <li>• A knife is not required to cut this food, but may be used to help loading a fork or spoon</li> <li>• Chewing is required before swallowing</li> <li>• Soft, tender and moist throughout but with no separate thin liquid</li> <li>• 'Bite-sized' pieces as appropriate for size and oral processing skills             <ul style="list-style-type: none"> <li>• <i>Paediatric, 8mm pieces</i></li> <li>• <i>Adults, 15 mm = 1.5 cm pieces</i></li> </ul> </li> </ul> |
| <p>Physiological rationale for this level of thickness</p>                            | <ul style="list-style-type: none"> <li>• Biting is not required</li> <li>• Chewing is required</li> <li>• Tongue force and control is required to move the food for chewing and to keep it within the mouth during chewing</li> <li>• Tongue force is required to move the bolus for swallowing</li> <li>• Pain or fatigue on chewing</li> <li>• Missing teeth, poorly fitting dentures</li> </ul>                                                                                                                                                                                                                                                       |
| <p>TESTING METHOD</p> <p>Fork Pressure test</p>                                       | <ul style="list-style-type: none"> <li>• Pressure from a fork held on its side can be used to 'cut' or break this texture into smaller pieces</li> <li>• When a sample the size of a thumb nail (~1.5x1.5 cm) is pressed with the base of a fork to a pressure where the thumb nail blanches to white, the sample squashes and changes shape, and does not return to its original shape when the fork is removed.</li> </ul>                                                                                                                                                                                                                             |
| <p>Spoon Pressure test</p>                                                            | <ul style="list-style-type: none"> <li>• Pressure from a spoon held on its side can be used to 'cut' or break this texture into smaller pieces.</li> <li>• When a sample the size of a thumb nail (~1.5 cm x1.5 cm) is pressed with the bowl of a spoon, the sample squashes and changes shape, and does not return to its original shape when the spoon is removed.</li> </ul>                                                                                                                                                                                                                                                                          |
| <p>Chopstick test</p>                                                                 | <ul style="list-style-type: none"> <li>• Chopsticks can be used to break this texture into smaller pieces</li> </ul>                                                                                                                                                                                                                                                                                                                                                                                                                                                                                                                                     |
| <p>Finger test</p>                                                                    | <ul style="list-style-type: none"> <li>• Use a sample the size of the thumb nail (~1.5 cm x 1.5 cm). It is possible to squash a sample of this texture</li> </ul>                                                                                                                                                                                                                                                                                                                                                                                                                                                                                        |

|                                                                                                                                       |                                                                                                                                                                                                                                                                                                                                                                                                                                                                                                                                                                                                                                                                                                                                                                                                                                                                                                                                                                                                                                                                                                                                                                                                                                                                                                                                                                                                                                                                                                                                                                                                                                                                                                                                                                                                                                                                                                                                                                                                                                                                                              |
|---------------------------------------------------------------------------------------------------------------------------------------|----------------------------------------------------------------------------------------------------------------------------------------------------------------------------------------------------------------------------------------------------------------------------------------------------------------------------------------------------------------------------------------------------------------------------------------------------------------------------------------------------------------------------------------------------------------------------------------------------------------------------------------------------------------------------------------------------------------------------------------------------------------------------------------------------------------------------------------------------------------------------------------------------------------------------------------------------------------------------------------------------------------------------------------------------------------------------------------------------------------------------------------------------------------------------------------------------------------------------------------------------------------------------------------------------------------------------------------------------------------------------------------------------------------------------------------------------------------------------------------------------------------------------------------------------------------------------------------------------------------------------------------------------------------------------------------------------------------------------------------------------------------------------------------------------------------------------------------------------------------------------------------------------------------------------------------------------------------------------------------------------------------------------------------------------------------------------------------------|
|                                                                                                                                       | <p>using finger pressure such that the thumb and index finger nails blanch to white. The sample will not return to its initial shape once pressure is released.</p>                                                                                                                                                                                                                                                                                                                                                                                                                                                                                                                                                                                                                                                                                                                                                                                                                                                                                                                                                                                                                                                                                                                                                                                                                                                                                                                                                                                                                                                                                                                                                                                                                                                                                                                                                                                                                                                                                                                          |
| <p>Food specific or<br/>Other examples</p> <p>Note:</p> <p><i>Paediatric, 8mm pieces</i><br/><i>Adults, 15 mm = 1.5 cm pieces</i></p> | <p>MEAT</p> <ul style="list-style-type: none"> <li>• <u>Cooked</u>, tender meat no bigger than <ul style="list-style-type: none"> <li>• <i>Paediatric, 8mm pieces</i></li> <li>• <i>Adults, 15 mm = 1.5 x 1.5 cm pieces</i></li> </ul> </li> <li>• If texture cannot be served soft and tender at 1.5 cm x 1.5 cm, serve minced and moist</li> </ul> <p>FISH</p> <ul style="list-style-type: none"> <li>• Soft enough cooked fish to break into small pieces with fork, spoon or chopsticks no larger than <ul style="list-style-type: none"> <li>• <i>Paediatric, 8mm pieces</i></li> <li>• <i>Adults, 15 mm = 1.5 cm pieces</i></li> </ul> </li> <li>• No bones</li> </ul> <p>CASSEROLE/STEW/CURRY</p> <ul style="list-style-type: none"> <li>• Liquid portion must be thick</li> <li>• Can contain meat, fish or vegetables if final cooked pieces are soft and tender and no larger than <ul style="list-style-type: none"> <li>• <i>Paediatric, 8mm pieces</i></li> <li>• <i>Adults, 15 mm = 1.5 cm pieces</i></li> </ul> </li> <li>• No hard lumps</li> </ul> <p>FRUIT</p> <ul style="list-style-type: none"> <li>• Serve mashed</li> <li>• Fibrous parts of fruit are not suitable</li> <li>• Drain excess juice</li> <li>• Assess individual ability to manage fruit with high water content (e.g. watermelon) where juice separates from solid in the mouth during chewing</li> </ul> <p>VEGETABLES</p> <ul style="list-style-type: none"> <li>• Steamed or boiled vegetables with final cooked size of <ul style="list-style-type: none"> <li>• <i>Paediatric, 8mm pieces</i></li> <li>• <i>Adults, 15 mm = 1.5 cm pieces</i></li> </ul> </li> <li>• Stir fried vegetables are often <u>too firm</u> and <u>not soft</u> or tender</li> </ul> <p>CEREAL</p> <ul style="list-style-type: none"> <li>• Smooth with soft tender lumps no bigger than <ul style="list-style-type: none"> <li>• <i>Paediatric, 8mm pieces</i></li> <li>• <i>Adults, 15 mm = 1.5 cm pieces</i></li> </ul> </li> <li>• Texture fully softened</li> <li>• Any excess milk or fluid must drained</li> </ul> |

---

|  |                                                                                                                                                                                                                                                                                                                                                                                                                                                                                                   |
|--|---------------------------------------------------------------------------------------------------------------------------------------------------------------------------------------------------------------------------------------------------------------------------------------------------------------------------------------------------------------------------------------------------------------------------------------------------------------------------------------------------|
|  | <p><b>BREAD</b></p> <ul style="list-style-type: none"><li>• Pre-gelled 'soaked' breads that are very moist and gelled through the entire thickness</li><li>• No regular dry bread unless assessed as suitable by dysphagia specialist, on an individual basis (if considered appropriate must also conform to paediatric 8mm, and adult 1.5 x1.5 cm size requirements)</li></ul> <p><b>RICE</b></p> <ul style="list-style-type: none"><li>• Not particulate/grainy, sticky or glutinous</li></ul> |
|--|---------------------------------------------------------------------------------------------------------------------------------------------------------------------------------------------------------------------------------------------------------------------------------------------------------------------------------------------------------------------------------------------------------------------------------------------------------------------------------------------------|

---

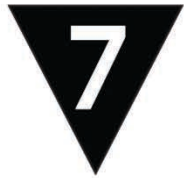

# REGULAR

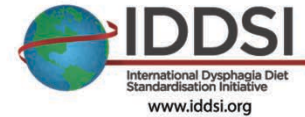

|                                                                                                  |                                                                                                                                                                                                                                                                                                                                                                                                                                            |
|--------------------------------------------------------------------------------------------------|--------------------------------------------------------------------------------------------------------------------------------------------------------------------------------------------------------------------------------------------------------------------------------------------------------------------------------------------------------------------------------------------------------------------------------------------|
| <p>Description/characteristics</p> <p>There are <u>NO</u> texture restrictions at this level</p> | <ul style="list-style-type: none"><li>• Normal, everyday foods of various textures that are developmentally and age appropriate</li><li>• Any method may be used to eat these foods</li><li>• Foods may be hard and crunchy or naturally soft</li><li>• Includes hard, tough, chewy, fibrous, stringy, dry, crispy, crunchy, or crumbly bits</li><li>• Includes food that contains pips, seeds, pith inside skin, husks or bones</li></ul> |
| <p>Physiological rationale for this level of thickness</p>                                       | <ul style="list-style-type: none"><li>• Ability to bite hard or soft foods and chew them for long enough that they form a soft cohesive ball/bolus that is 'swallow ready'</li><li>• An ability to chew all food textures without tiring easily</li><li>• An ability to remove bone or gristle that cannot be swallowed safely from the mouth</li></ul>                                                                                    |
| <p>TESTING METHOD</p>                                                                            | <ul style="list-style-type: none"><li>• N/A</li></ul>                                                                                                                                                                                                                                                                                                                                                                                      |

# TRANSITIONAL FOODS

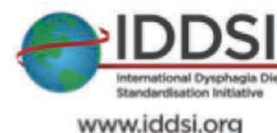

|                                                     |                                                                                                                                                                                                                                                                                                                                                                                                                                                                                                                                                                                                                                                                                                                                                                       |
|-----------------------------------------------------|-----------------------------------------------------------------------------------------------------------------------------------------------------------------------------------------------------------------------------------------------------------------------------------------------------------------------------------------------------------------------------------------------------------------------------------------------------------------------------------------------------------------------------------------------------------------------------------------------------------------------------------------------------------------------------------------------------------------------------------------------------------------------|
| Description/characteristics                         | <ul style="list-style-type: none"> <li>• Food that starts as one texture (e.g. firm solid) and changes into another texture specifically when moisture (e.g. water or saliva) is applied, or when a change in temperature occurs (e.g. heating)</li> </ul>                                                                                                                                                                                                                                                                                                                                                                                                                                                                                                            |
| Physiological rationale for this level of thickness | <ul style="list-style-type: none"> <li>• Biting not required</li> <li>• Minimal chewing required</li> <li>• Tongue can be used to break these foods once altered by temperature or with addition of moisture/saliva</li> <li>➤ May be used for developmental teaching or rehabilitation of chewing skills (e.g. development of chewing in the paediatric population and developmental disability population; rehabilitation of chewing function post stroke)</li> </ul>                                                                                                                                                                                                                                                                                               |
| <p>TESTING METHOD</p> <p>Fork pressure test</p>     | <ul style="list-style-type: none"> <li>• After moisture or temperature has been applied, the sample can be easily deformed and does not recover its shape when the force is lifted.</li> <li>• Use a sample the size of the thumb nail (~1.5 cm x 1.5 cm), place 1 ml of water on the sample and wait one minute. Apply fork pressure using the base of the fork until the thumbnail blanches to white. The sample is a transitional food texture if after removing the fork pressure:             <ul style="list-style-type: none"> <li>• The sample has been squashed and disintegrated and no longer looks like its original state</li> <li>• Or it has melted significantly and no longer looks like its original state (e.g. ice chips).</li> </ul> </li> </ul> |
| Spoon pressure test                                 | <ul style="list-style-type: none"> <li>• As above, using the bowl of the spoon in place of the fork</li> </ul>                                                                                                                                                                                                                                                                                                                                                                                                                                                                                                                                                                                                                                                        |
| Chopstick test                                      | <ul style="list-style-type: none"> <li>• Use a sample the size of the thumb nail (~1.5 cm x 1.5 cm), place 1 ml of water on the sample and wait one minute. The sample should be easily broken apart using chopsticks with minimal pressure.</li> </ul>                                                                                                                                                                                                                                                                                                                                                                                                                                                                                                               |





# FOOD TEXTURE REQUIREMENTS

A green shaded check mark  in the summary table below indicates a characteristic that is required and acceptable for foods in each level.

A red shaded  in the summary table below indicates a food characteristic that is not acceptable for foods in each level.

| DESCRIPTION/CHARACTERISTICS                                                         | 3<br>Liquidised/<br>Moderately<br>thick                                             | 4<br>Pureed/<br>Extremely<br>thick                                                    | 5<br>Minced &<br>moist                                                                | 6<br>Soft &<br>bite-<br>sized                                                         |
|-------------------------------------------------------------------------------------|-------------------------------------------------------------------------------------|---------------------------------------------------------------------------------------|---------------------------------------------------------------------------------------|---------------------------------------------------------------------------------------|
| No skin, no crust even after cooking, heating or standing                           |    |    |    |    |
| No separation of thin (watery) liquid                                               |    |    |    |    |
| Will hold its shape on a plate, fork or spoon                                       |  |  |  |  |
| Soft grainy texture quality                                                         |  |  |  |  |
| Visible lumps                                                                       |  |  |  |  |
| Can contain soft, smooth, rounded, moist, small (2-4 mm) lumps if tender throughout |  |  |  |  |
| Can contain soft, moist large (8-15 mm) lumps if tender throughout                  |  |  |  |  |

# FOOD TEXTURE RESTRICTIONS

A green shaded check mark  in the summary table below indicates a characteristic that is acceptable and may be included for foods in each level.

A red shaded  in the summary table below indicates a food characteristic that is not acceptable and must be avoided for foods in each level.

| DESCRIPTION/CHARACTERISTICS                                                                                             | 3<br>Liquidised/<br>Moderately<br>thick                                             | 4<br>Pureed/<br>Extremely<br>thick                                                  | 5<br>Minced &<br>moist                                                                | 6<br>Soft &<br>bite-<br>sized                                                         | 7<br>Regular                                                                          |
|-------------------------------------------------------------------------------------------------------------------------|-------------------------------------------------------------------------------------|-------------------------------------------------------------------------------------|---------------------------------------------------------------------------------------|---------------------------------------------------------------------------------------|---------------------------------------------------------------------------------------|
| Mixed thin-thick textures (e.g. soup with pieces of food, cereal with milk; bubble tea)                                 |    |    |    |    |    |
| Hard or dry food (e.g. nuts, raw carrot, apple, crackling, hard crusty rolls)                                           |    |    |    |    |    |
| Fibrous or tough (e.g. steak, pineapple)                                                                                |    |    |    |    |    |
| Chewy (e.g. lollies/candies/sweets, cheese chunks, marshmallows, chewing gum, sticky mashed potato, dried fruits)       |    |    |    |    |    |
| Crispy (e.g. crackling, crisp bacon, cornflakes)                                                                        |  |  |  |  |  |
| Crunchy (e.g. raw carrot, raw apple, popcorn)                                                                           |  |  |  |  |  |
| Sharp or spiky (e.g. corn chips)                                                                                        |  |  |  |  |  |
| Crumbly bits (e.g. crumbly dry cakes or biscuits)                                                                       |  |  |  |  |  |
| Pips, seeds, pith (e.g. apple seeds, orange pith)                                                                       |  |  |  |  |  |
| Skins or outer shells (e.g. peas, grapes)                                                                               |  |  |  |  |  |
| Husks (e.g. psyllium, bran)                                                                                             |  |  |  |  |  |
| Skin (e.g. chicken skin, salmon skin)                                                                                   |  |  |  |  |  |
| Bone or gristle (e.g. chicken bones, fish bones)                                                                        |  |  |  |  |  |
| Round, long shaped foods (e.g. sausage, grapes)                                                                         |  |  |  |  |  |
| Sticky or Gummy foods (e.g. nut butter, overcooked oatmeal, edible gelatin; Konjac containing jelly, sticky rice cakes) |  |  |  |  |  |
| Stringy foods (e.g. beans, rhubarb)                                                                                     |  |  |  |  |  |

| DESCRIPTION/CHARACTERISTICS                                                          | 3<br>Liquidised/<br>Moderately<br>thick | 4<br>Pureed/<br>Extremely<br>thick | 5<br>Minced &<br>moist   | 6<br>Soft &<br>bite-<br>sized | 7<br>Regular                        |
|--------------------------------------------------------------------------------------|-----------------------------------------|------------------------------------|--------------------------|-------------------------------|-------------------------------------|
| Hard pieces, skins or crusts formed during cooking or heating                        | <input type="checkbox"/>                | <input type="checkbox"/>           | <input type="checkbox"/> | <input type="checkbox"/>      | <input checked="" type="checkbox"/> |
| 'Floppy' textures (e.g. lettuce, cucumber, baby spinach leaves)                      | <input type="checkbox"/>                | <input type="checkbox"/>           | <input type="checkbox"/> | <input type="checkbox"/>      | <input checked="" type="checkbox"/> |
| 'Juicy' food where the juice separates from the solid in the mouth (e.g. watermelon) | <input type="checkbox"/>                | <input type="checkbox"/>           | <input type="checkbox"/> | <input type="checkbox"/>      | <input checked="" type="checkbox"/> |

# IDDSI Flow Test

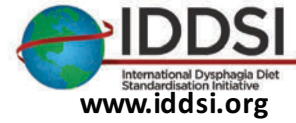

1

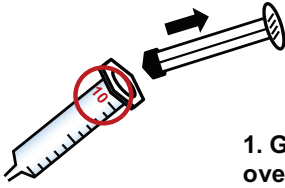

1. Get a stopwatch and some 10 mL syringes: see specification over the page. Remove the plunger from one syringe & discard.

2

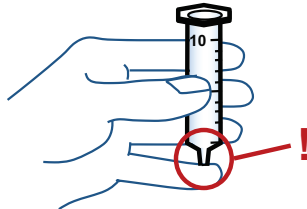

2. Cover the nozzle of the syringe with your finger, making a seal.

3

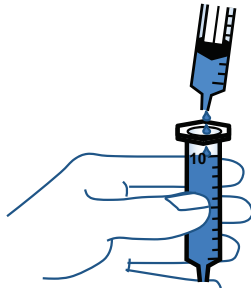

3. Fill the syringe up to the 10 mL line with fluid - it's recommended to use another syringe to do this.

4

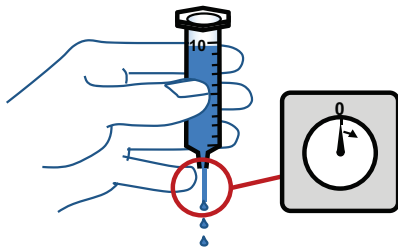

4. Remove your finger from the nozzle end at the same time as starting the stopwatch.

5

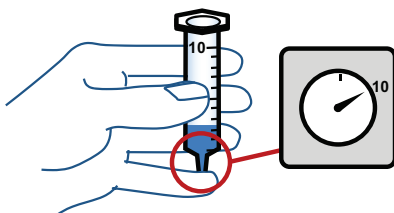

5. At 10 seconds, replace your finger over the nozzle, stopping the liquid flowing.

## IDDSI Level classifications based on liquid remaining at 10 seconds:

**Level 0:** All liquid has flowed through syringe.

**Level 1:** There is between 1 mL and 4 mL remaining.

**Level 2:** There is between 4 mL and 8 mL remaining.

**Level 3:** There is more than 8 mL remaining, but some liquid still flows through.

**Level 4:** If no liquid flows, the category is Level 4 or above.

*Level 4 can be easily identified **without** a syringe test: Material holds its own shape; small peaks remain on the surface. Too thick to be drunk from a cup or a straw, should be taken with a spoon. A full spoonful must drop off a spoon if turned sideways; a very gentle flick may be necessary but the material should not be firm, nor sticky.*

© Ben Hanson 8/4/2016
